# Supplementary material for: Multi-Target Strategy to Uncover Unexpected Compounds in Rinse-Off and Leave-On Cosmetics
Source: MDPI journal article supplement (doi:10.3390/molecules26092504), 2021-04-25
Supplement: s1 [file s1]

# Multi-target strategy to uncover unexpected compounds in rinse-off and leave-on cosmetics

Maria Celeiro\*, Laura Rubio, Carmen Garcia-Jares and Marta Lores

CRETUS Institute, Department of Analytical Chemistry, Nutrition and Food Science, Faculty of Chemistry,  
Universidade de Santiago de Compostela, E-15782, Santiago de Compostela, Spain;  
maria.celeiro.montero@usc.es (M.C); laura.rubio.lareu@usc.es (L.R); carmen.garcia.jares@usc.es (C.G-J)  
marta.lores@usc.es (M.L)

\* Correspondence: maria.celeiro.montero@usc.es (MC); Tel.: (+34-881814464)

## Content:

**Table S1.** Confirmation MS/MS transitions for the determination of APs and APEOs by  $\mu$ -MSPD-LC-MS/MS.

**Table S2.** Matrix effects assessment for APs and APEOs analysis by  $\mu$ -MSPD-LC-MS/MS.

**Table S1.** Confirmation MS/MS transitions for the determination of APs and APEOs by  $\mu$ -MSPD-LC-MS/MS.

| APs and APEOs     | Ionization mode | Fragments         | Precursor ion | Product ions | Collision energy (eV) |
|-------------------|-----------------|-------------------|---------------|--------------|-----------------------|
| NP + 4-NP isomers | -               | NP + 4-NP isomers | 219.1         | 116.9        | -80                   |
|                   |                 |                   |               | 133.0        | -44                   |
|                   |                 |                   |               | 117.0        | -86                   |
|                   |                 |                   | 219.1         | 133.0        | -44                   |
| NPEO              | +               | NPEO2             | 326.4         | 183.0        | 13                    |
|                   |                 | NPEO3             | 370.4         | 227.4        | 15                    |
| OPEO              | +               | OPEO2             | 312.3         | 183.0        | 11                    |
|                   |                 | OPEO3             | 356.3         | 227.0        | 12                    |
| NP40              | +               | NPEO4             | 414.1         | 397.4        | 15                    |
|                   |                 | NPEO5             | 458.4         | 441.4        | 19                    |
|                   |                 | NPEO6             | 502.5         | 485.5        | 20                    |
|                   |                 | NPEO7             | 546.5         | 529.5        | 23                    |
|                   |                 | NPEO8             | 590.5         | 573.5        | 22                    |
|                   |                 | NPEO9             | 634.5         | 617.5        | 25                    |
|                   |                 | NPEO10            | 678.4         | 661.50       | 28                    |
|                   |                 | NPEO11            | 722.6         | 705.6        | 28                    |

|                     |   |        |         |         |    |
|---------------------|---|--------|---------|---------|----|
|                     |   | NPEO12 | 766.6   | 749.6   | 29 |
|                     |   | NPEO13 | 810.6   | 793.6   | 31 |
|                     |   | NPEO14 | 854.6   | 837.6   | 33 |
|                     |   | NPEO15 | 898.6   | 881.6   | 34 |
|                     |   | NPEO16 | 942.6   | 925.6   | 36 |
|                     |   | NPEO17 | 986.6   | 969.6   | 36 |
|                     |   | NPEO18 | 1030.7  | 1013.7  | 37 |
|                     |   | NPEO19 | 1074.7  | 1057.7  | 38 |
|                     |   | NPEO20 | 1118.7  | 1101.7  | 40 |
|                     |   | OPEO4  | 400.3   | 383.3   | 16 |
|                     |   | OPEO5  | 444.4   | 427.4   | 18 |
|                     |   | OPEO6  | 488.4   | 471.4   | 21 |
|                     |   | OPEO7  | 532.4   | 515.4   | 24 |
|                     |   | OPEO8  | 576.4   | 559.4   | 25 |
|                     |   | OPEO9  | 620.4   | 603.4   | 27 |
|                     |   | OPEO10 | 664.4   | 647.4   | 28 |
|                     |   | OPEO11 | 708.5   | 691.5   | 29 |
| <b>Triton X-100</b> | + | OPEO12 | 752.5   | 735.5   | 30 |
|                     |   | OPEO13 | 796.5   | 779.5   | 31 |
|                     |   | OPEO14 | 840.6   | 823.6   | 31 |
|                     |   | OPEO15 | 884.6   | 867.6   | 33 |
|                     |   | OPEO16 | 928.6   | 911.6   | 34 |
|                     |   | OPEO17 | 972.6   | 955.6   | 35 |
|                     |   | OPEO18 | 1016.70 | 999.7   | 36 |
|                     |   | OPEO19 | 1060.7  | 1043.7  | 37 |
|                     |   | OPEO20 | 1104.80 | 1087.80 | 38 |

**Table S2.** Matrix effects assessment for APs and APEOs analysis by  $\mu$ -MSPD-LC-MS/MS.

| APs and APEOs    | External calibration   | Matrix-matched       |                       | SMM/SEC <sup>a</sup> |           |
|------------------|------------------------|----------------------|-----------------------|----------------------|-----------|
|                  |                        | Leave-on             | Rinse-off             | Leave-on             | Rinse-off |
| <b>NP + 4 NP</b> | $y = 8721.0x - 257035$ | $y = 6588.0x - 1E6$  | $y = 8257.6x - 2E6$   | 0.8                  | 0.9       |
| <b>NPEO</b>      | $y = 341.8x - 6972$    | $y = 341.7x - 68686$ | $y = 288.3x - 31344$  | 1.0                  | 0.8       |
| <b>OPEO</b>      | $y = 365.0x - 26602$   | $y = 562.5x + 27058$ | $y = 352.7x + 24986$  | 1.5                  | 1.0       |
| <b>NP40</b>      | $y = 974.7x + 137396$  | $y = 763.4x - 19857$ | $y = 985.5x + 196384$ | 0.8                  | 1.0       |
| <b>TX-100</b>    | $y = 715.9x + 101445$  | $y = 464.6x + 98288$ | $y = 708.3x + 21683$  | 0.6                  | 1.0       |

<sup>a</sup> SMM/SEC: Slope of the matrix-matched calibration between slope of the external calibration
